# Supplementary material for: Mechanistic insights of the copper(i)-catalysed reaction between chlorohydrazones and terminal alkynes
Source: Royal Society of Chemistry journal article supplement (doi:10.1039/d3nj02712k), 2023-01-01

*Supplementary Electronic Informations for*

**Mechanistic insights of the copper(I)-catalysed reaction between chlorohydrazone and terminal alkynes**

Alessandro Ponti, Alessandra Silvani and Giorgio Molteni\*

*Università degli Studi di Milano, Dipartimento di Chimica, via Golgi 19, 20133 Milano, Italy.*

[giorgio.molteni@unimi.it](mailto:giorgio.molteni@unimi.it)

- |                                                                     |   |
|---------------------------------------------------------------------|---|
| 1. Characterisation of chlorohydrazone D- <b>1a</b>                 | 2 |
| 2. NMR spectra of pyrazoles <b>3</b> and alkynylhydrazones <b>4</b> | 5 |

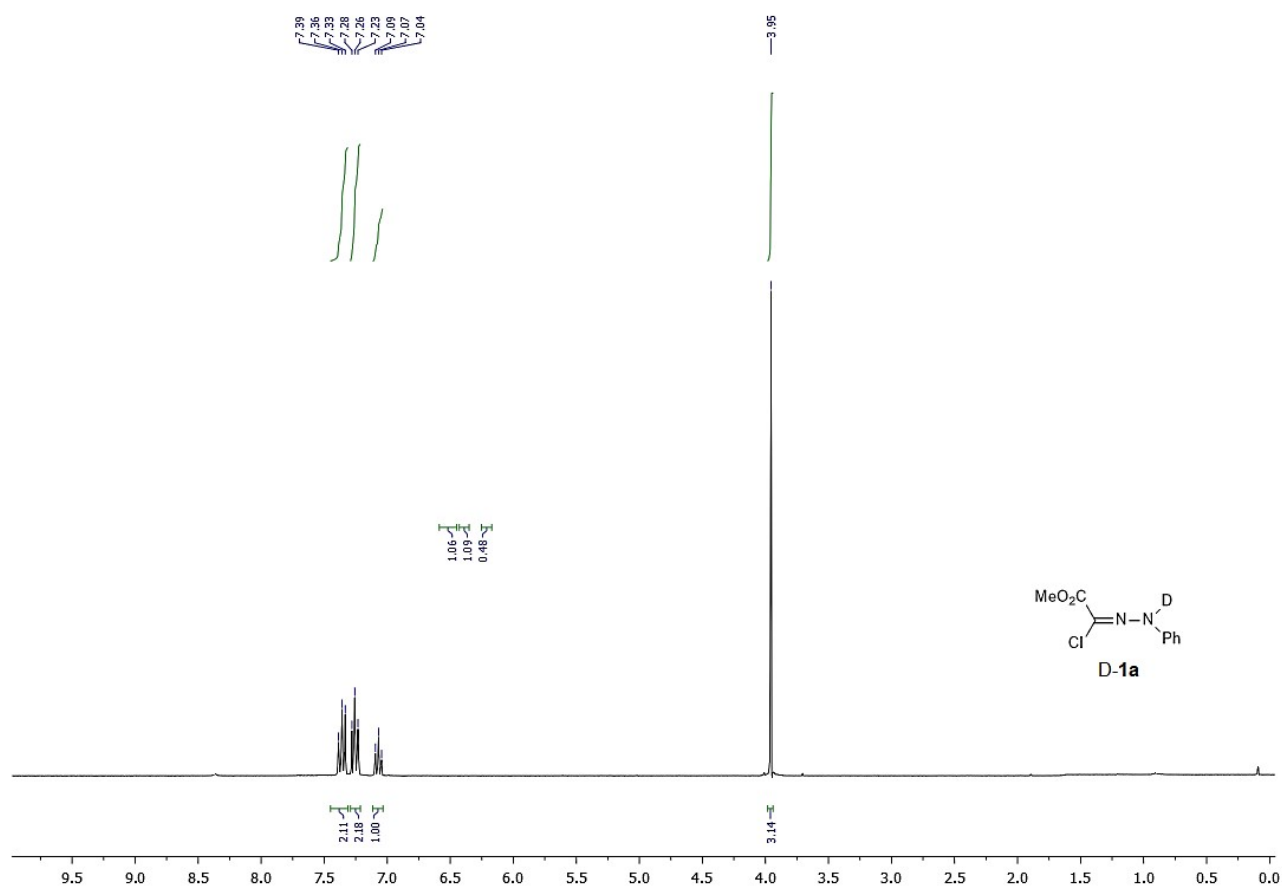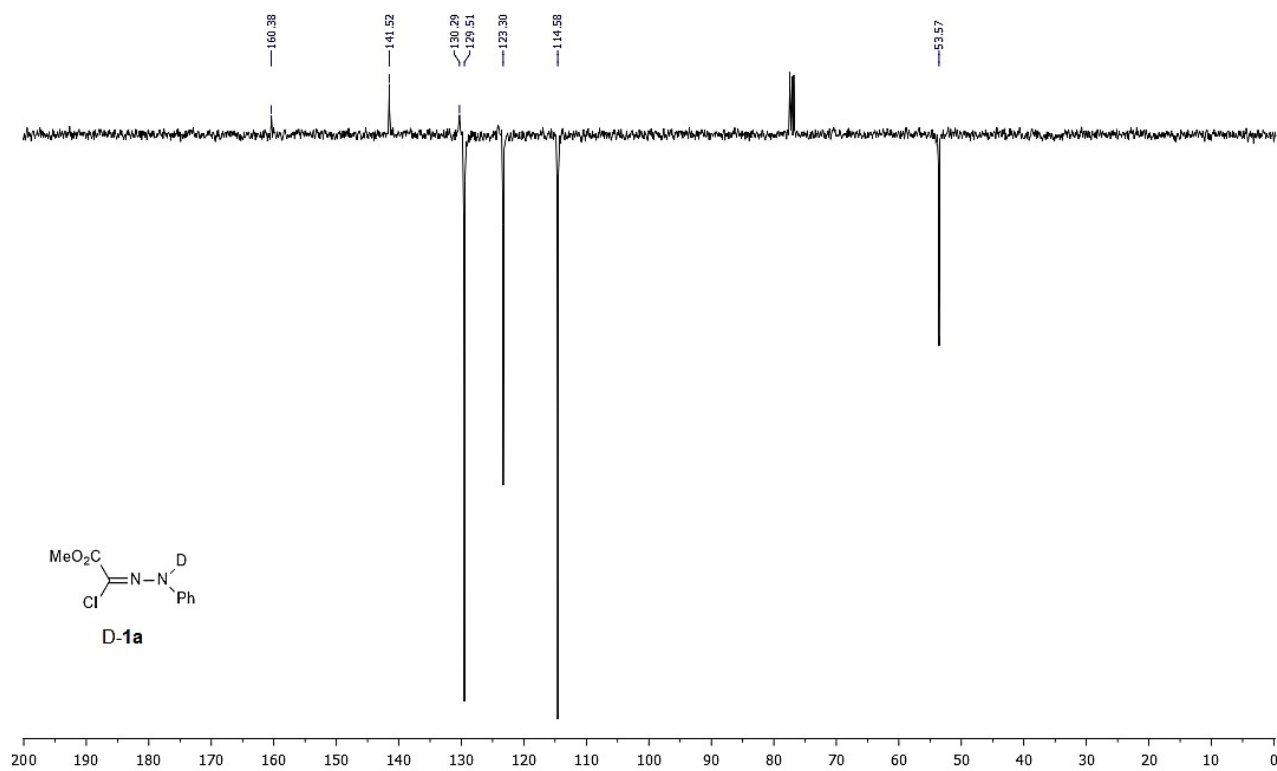

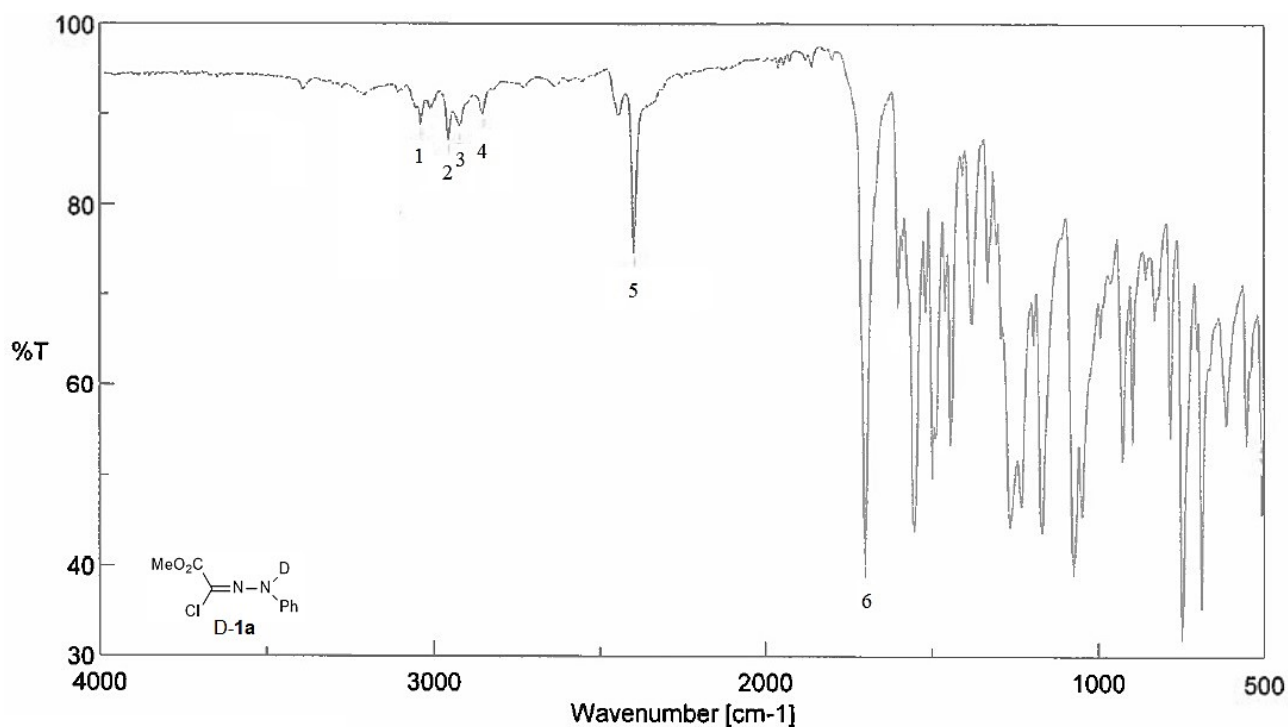

| No. | Position | Intensity | No. | Position | Intensity | No. | Position | Intensity |
|-----|----------|-----------|-----|----------|-----------|-----|----------|-----------|
| 1   | 3040.23  | 88.8881   | 2   | 2955.38  | 87.0843   | 3   | 2921.63  | 88.6055   |
| 4   | 2851.24  | 89.9954   | 5   | 2397.08  | 74.6103   | 6   | 1698.98  | 40.0705   |
| 7   | 1600.63  | 68.6299   |     |          |           |     |          |           |

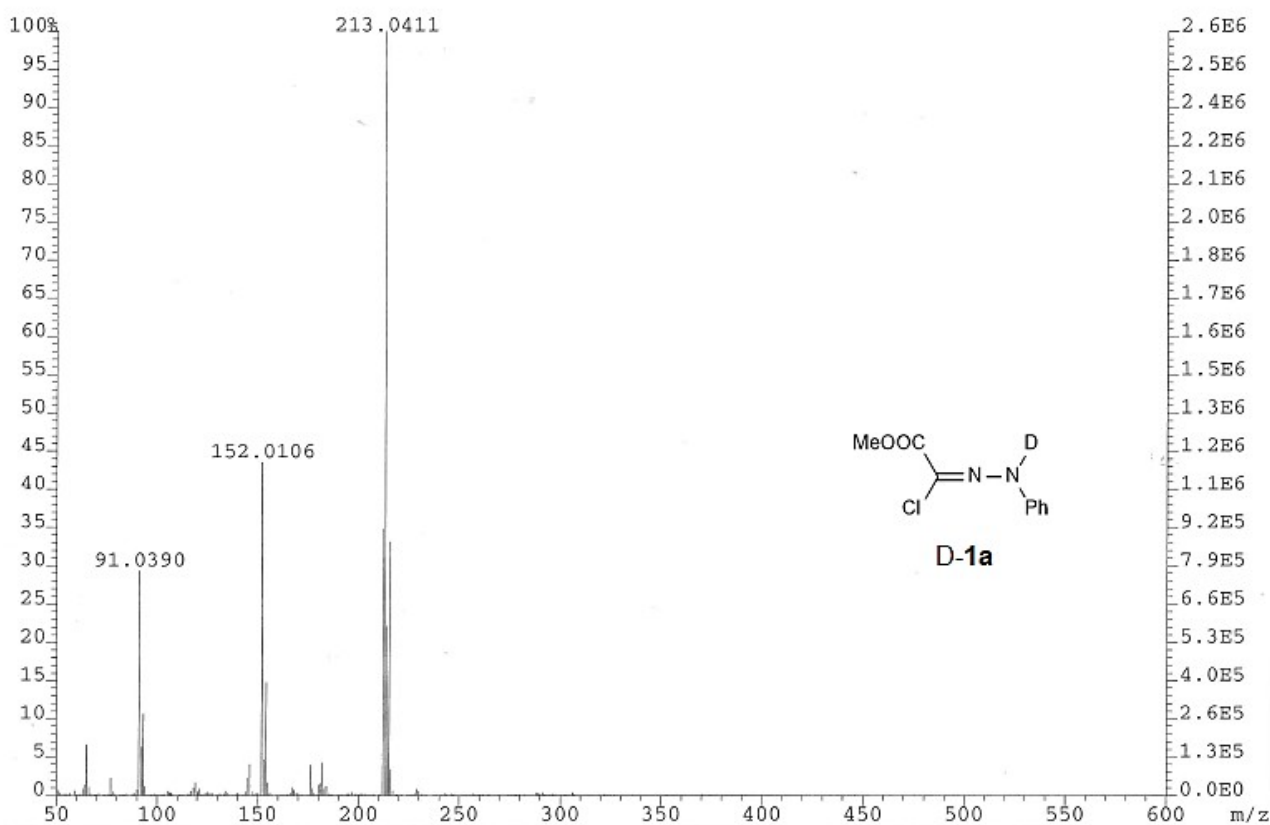

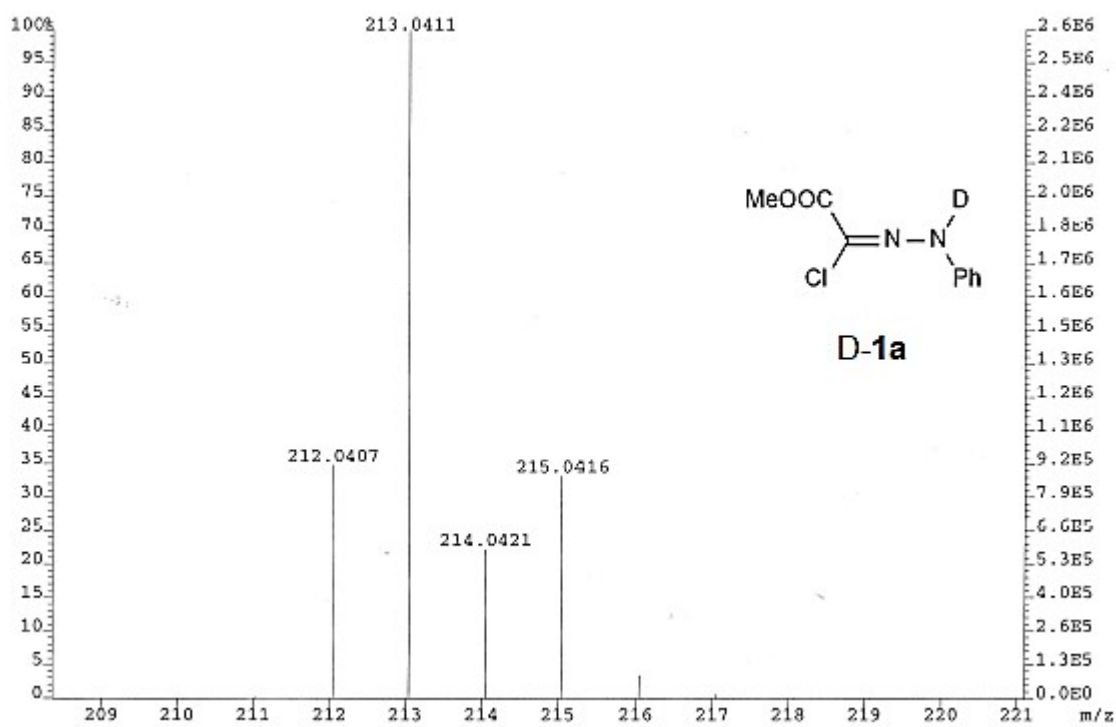

*Anal.* Calcd for C<sub>8</sub>H<sub>8</sub>DCIN<sub>2</sub>O<sub>2</sub>: C, 50.60; H, 4.72; N, 13.11. Found: C, 50.58; H, 4.70; N, 13.18.

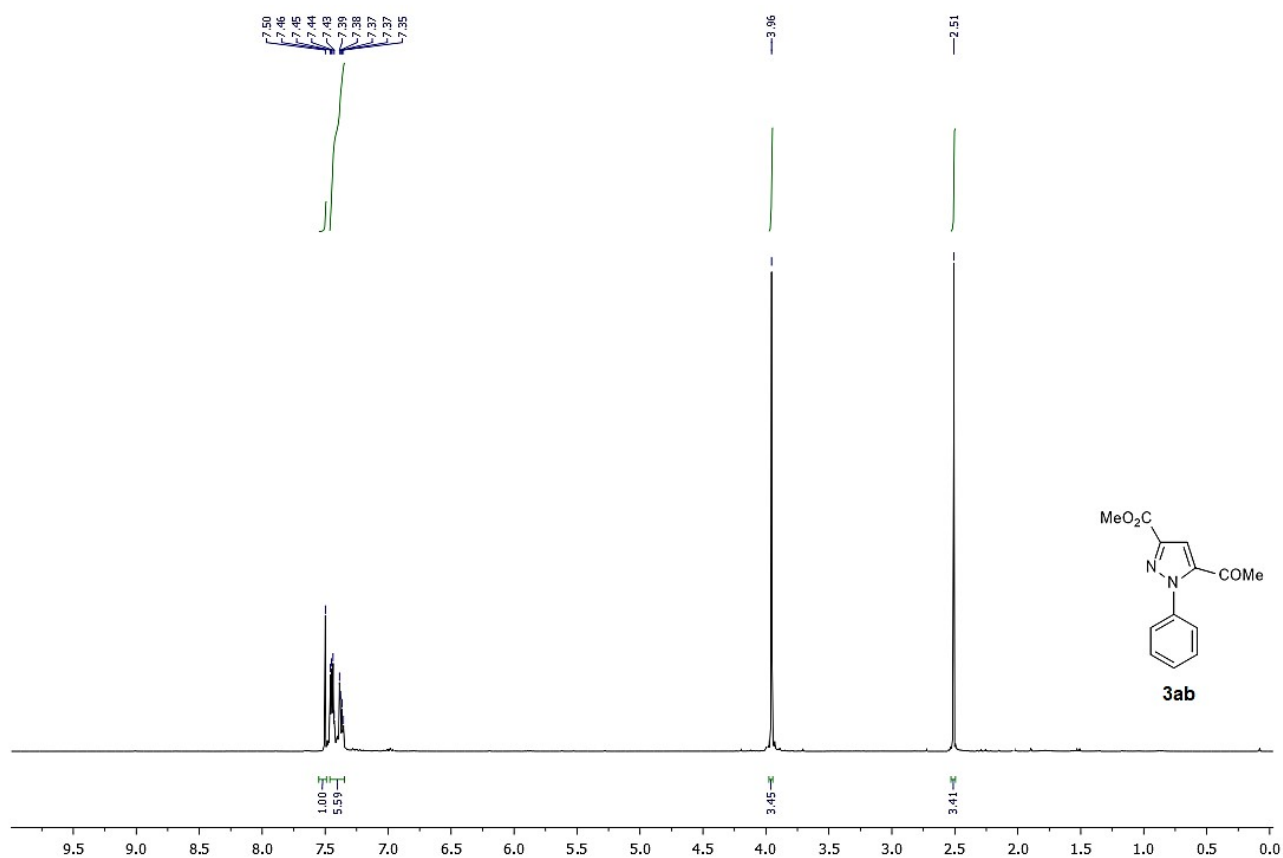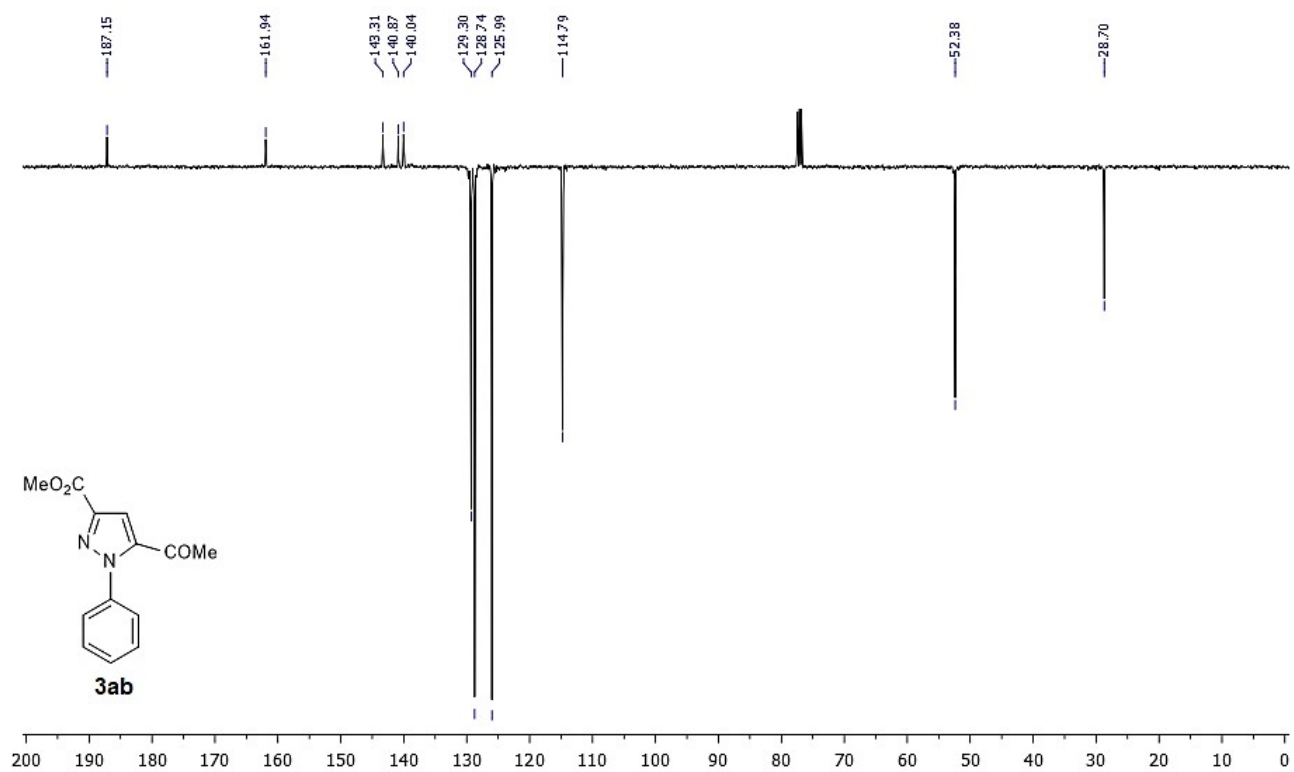

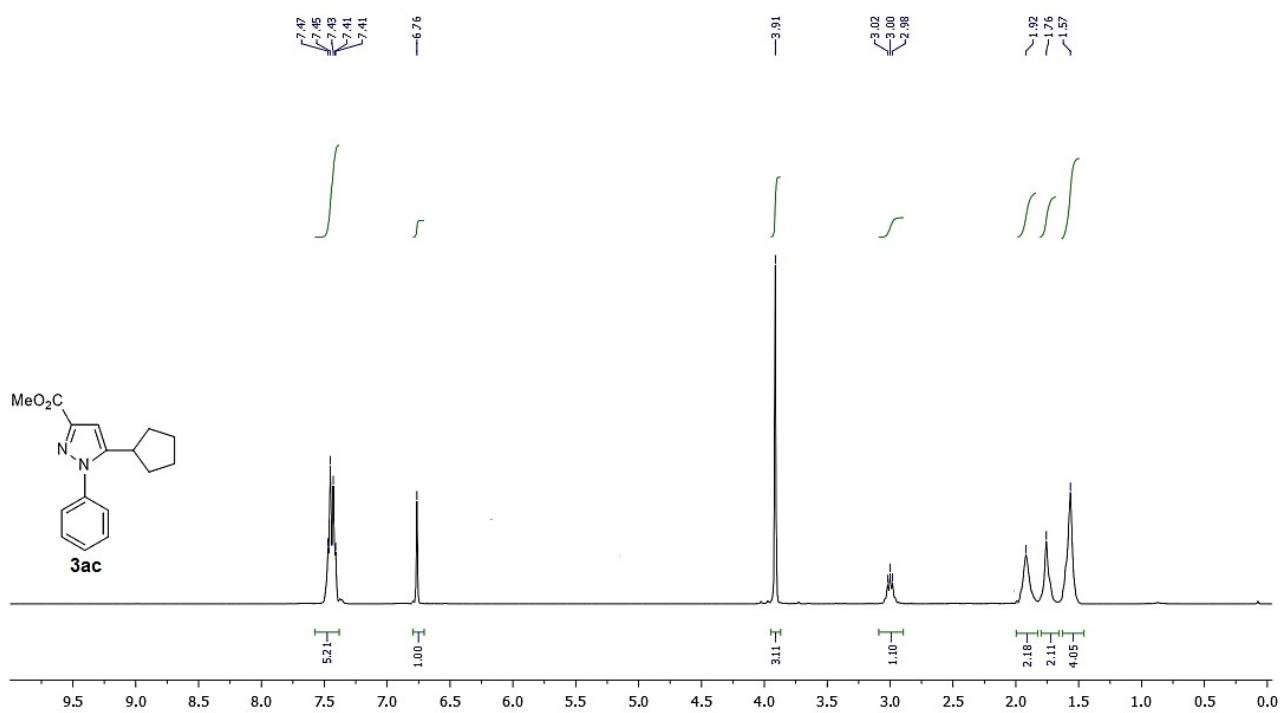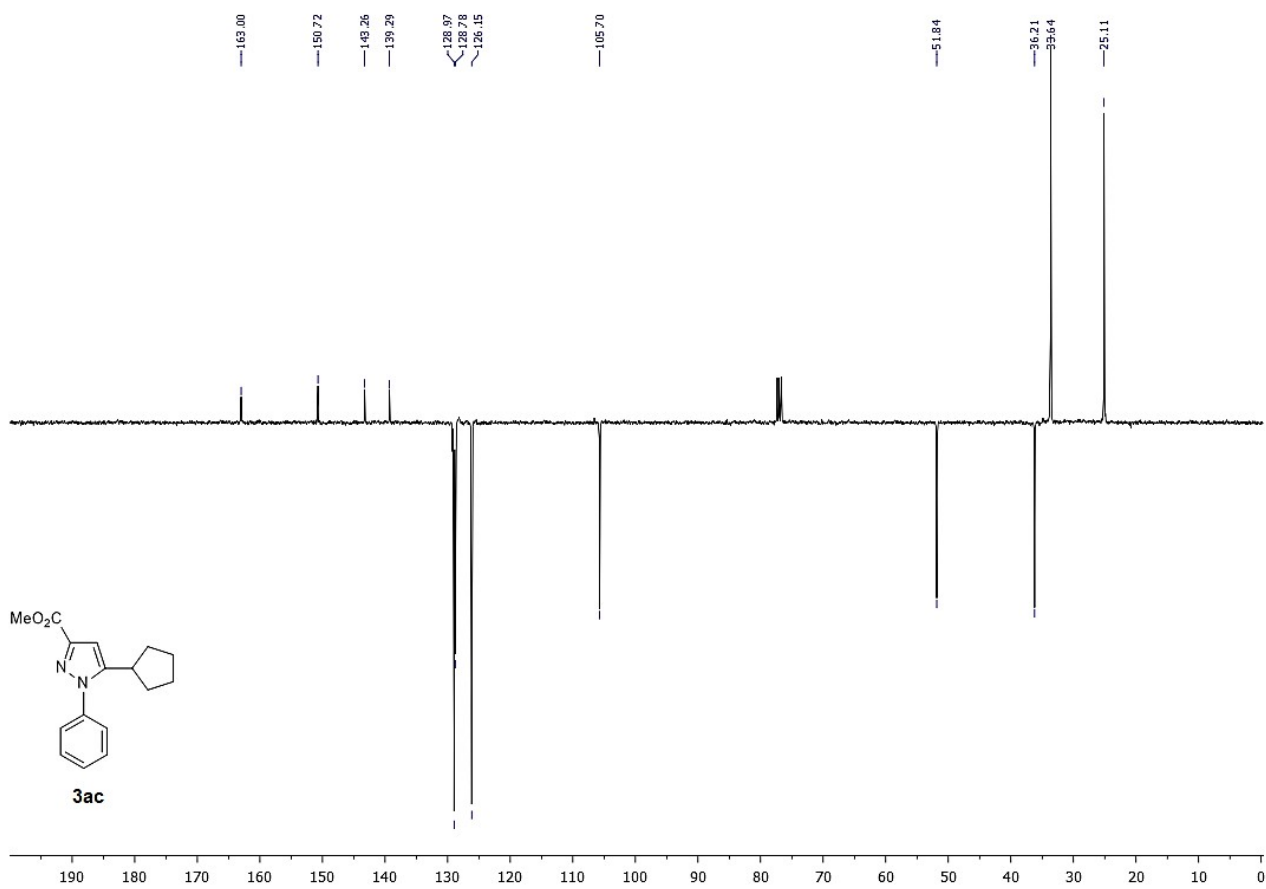

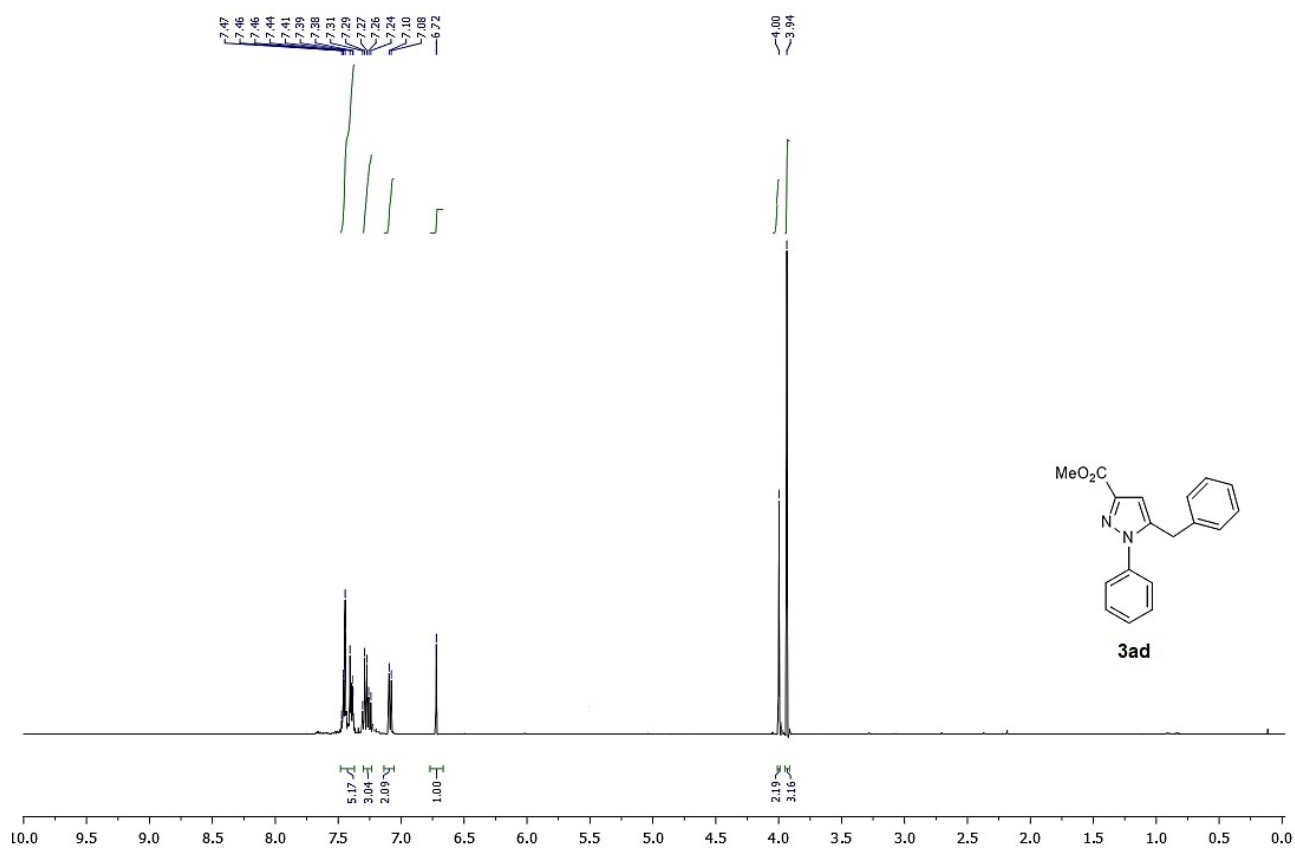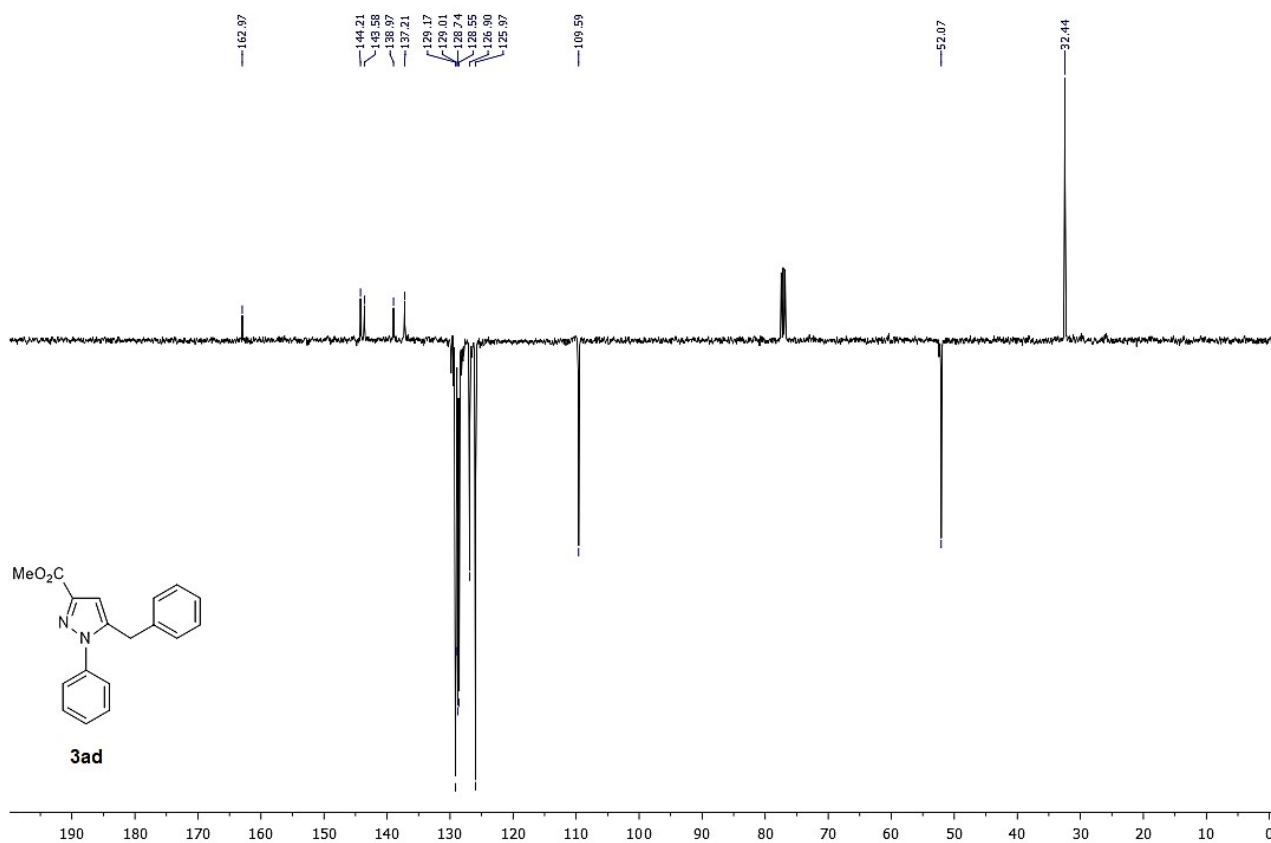

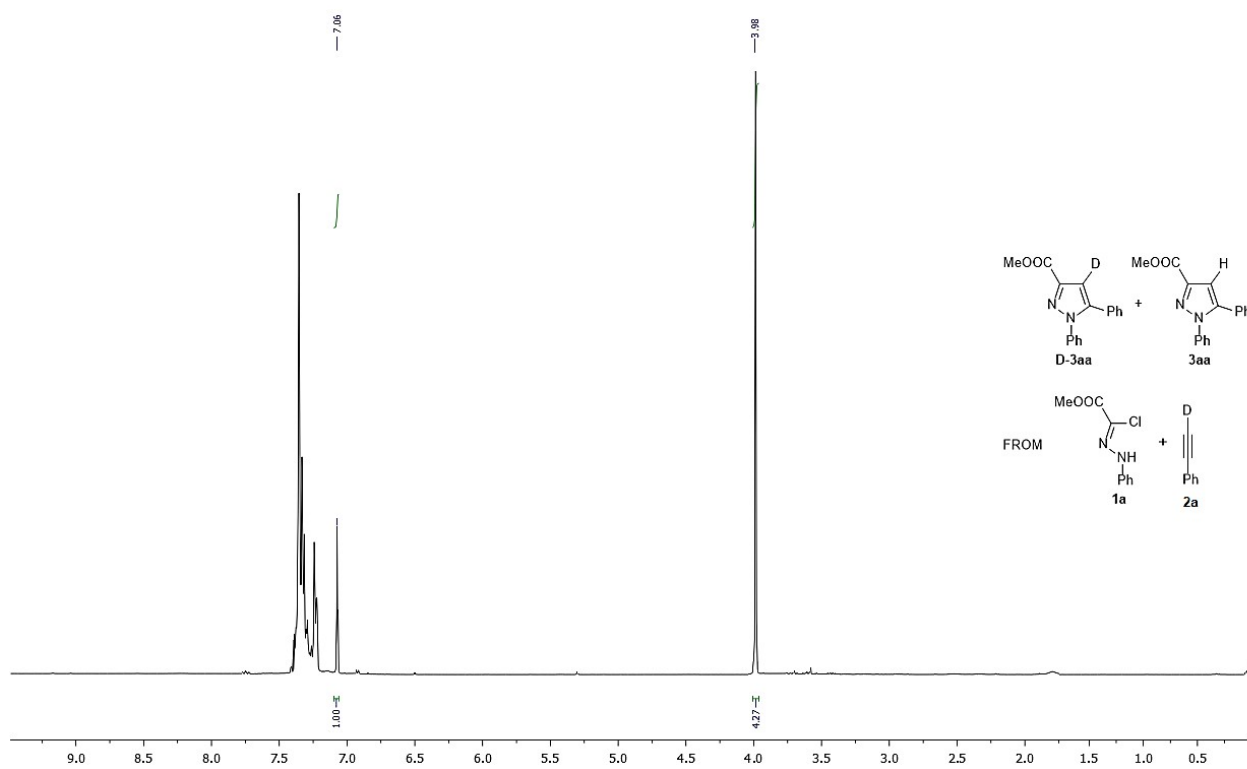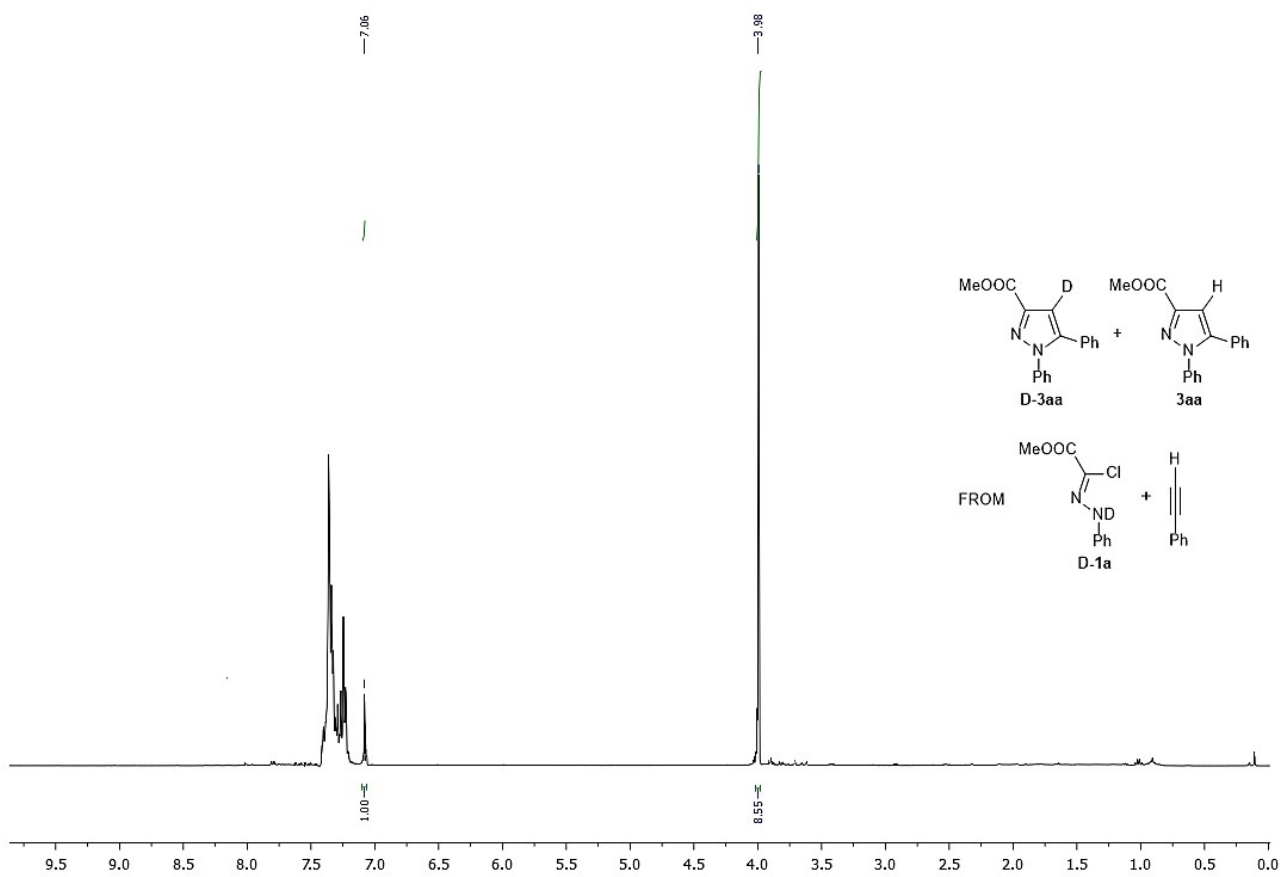



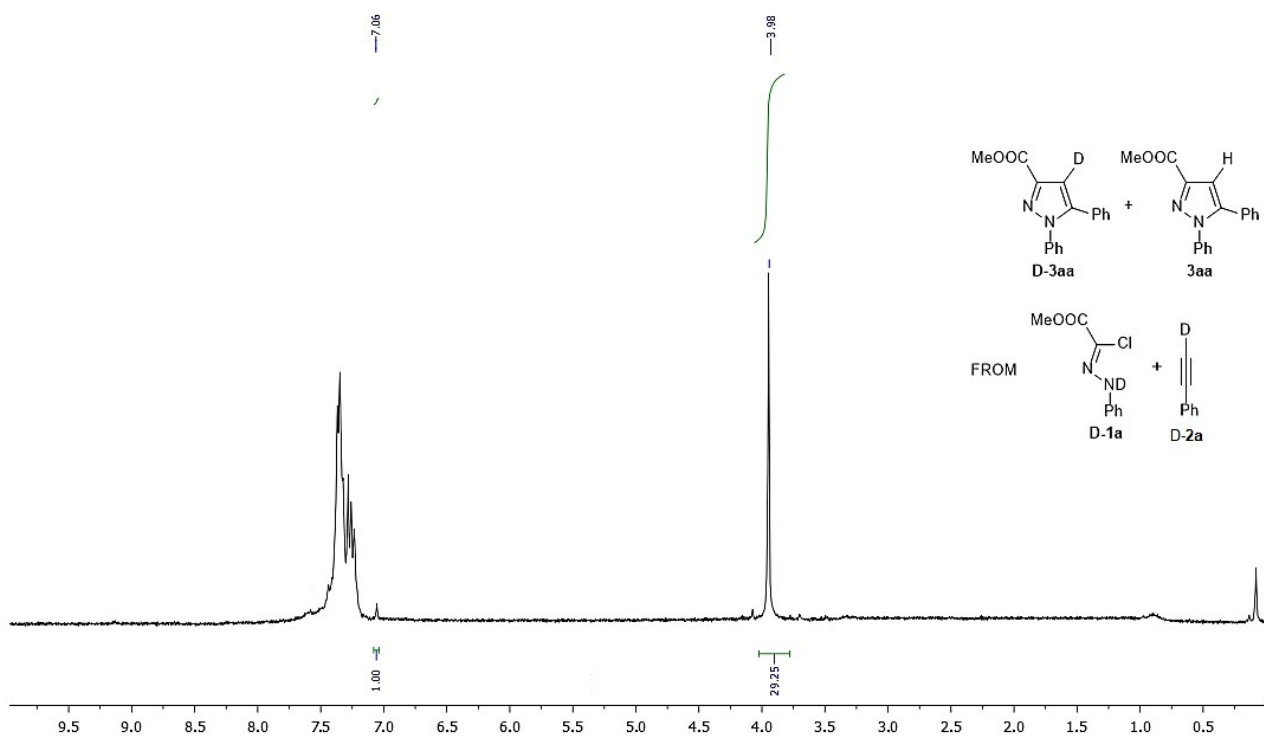

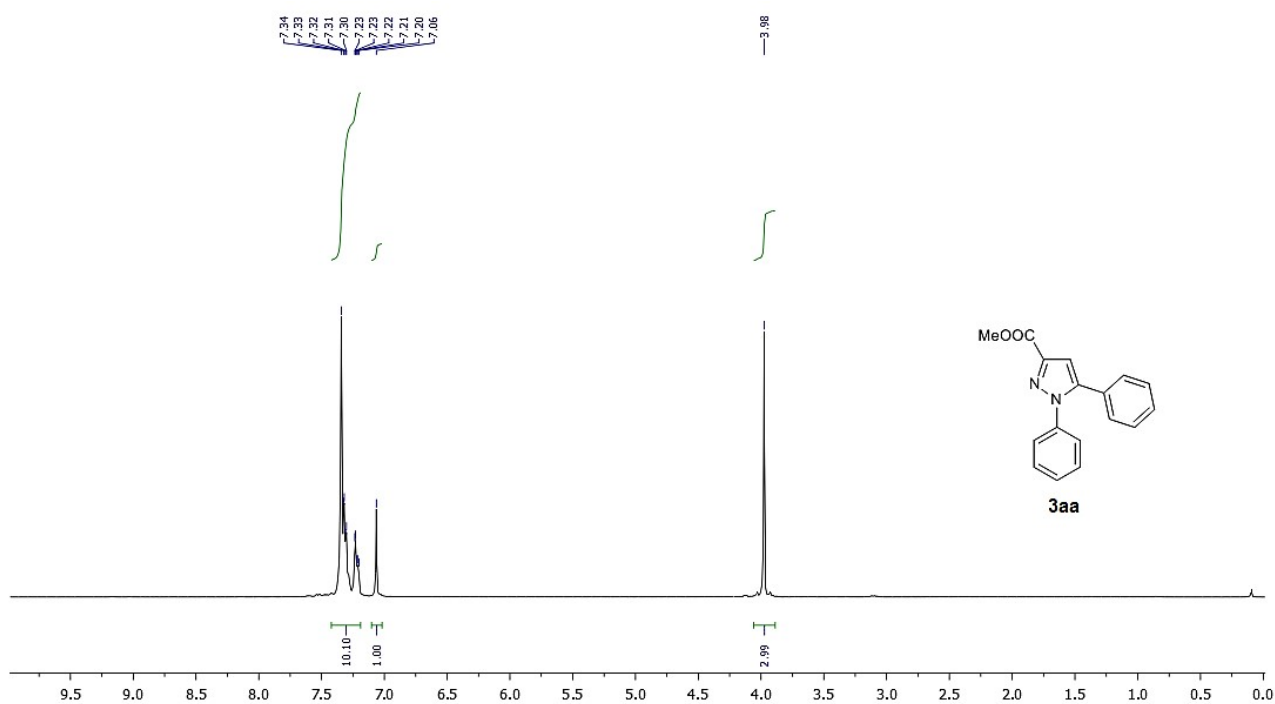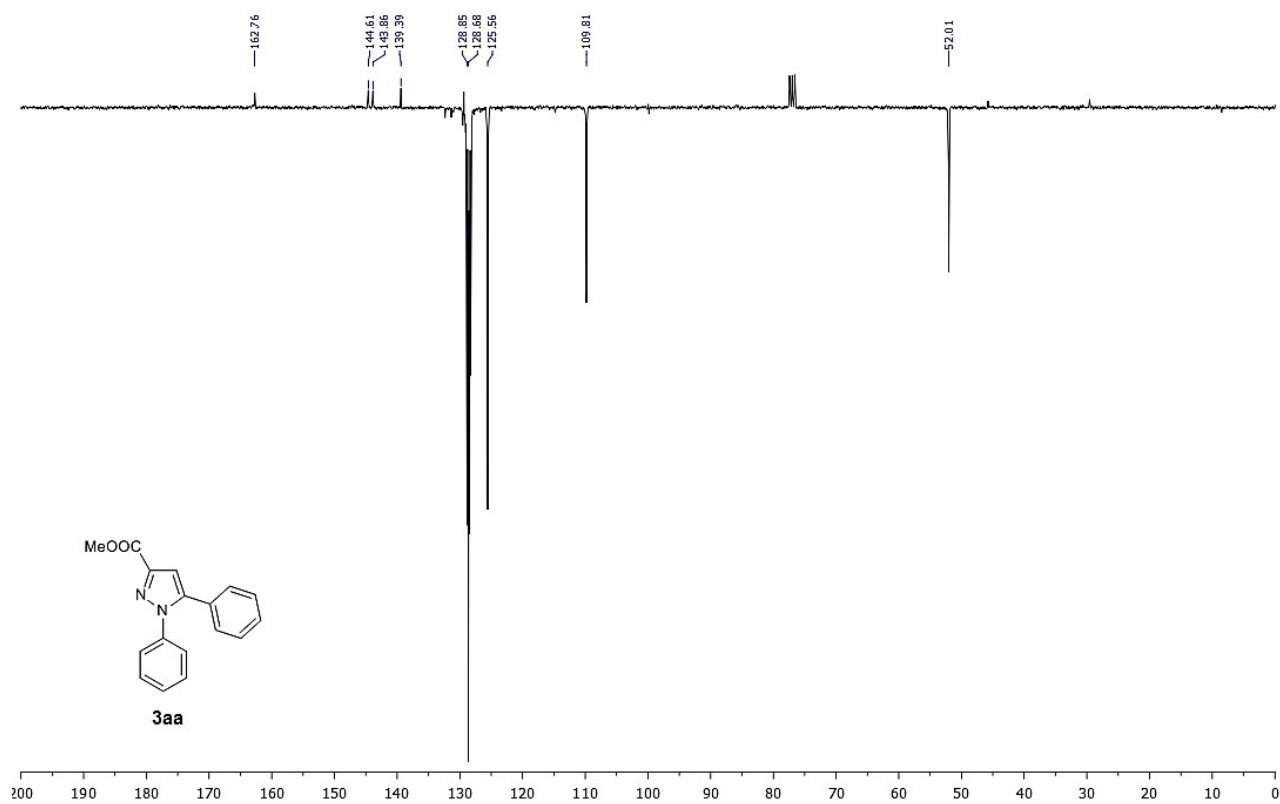

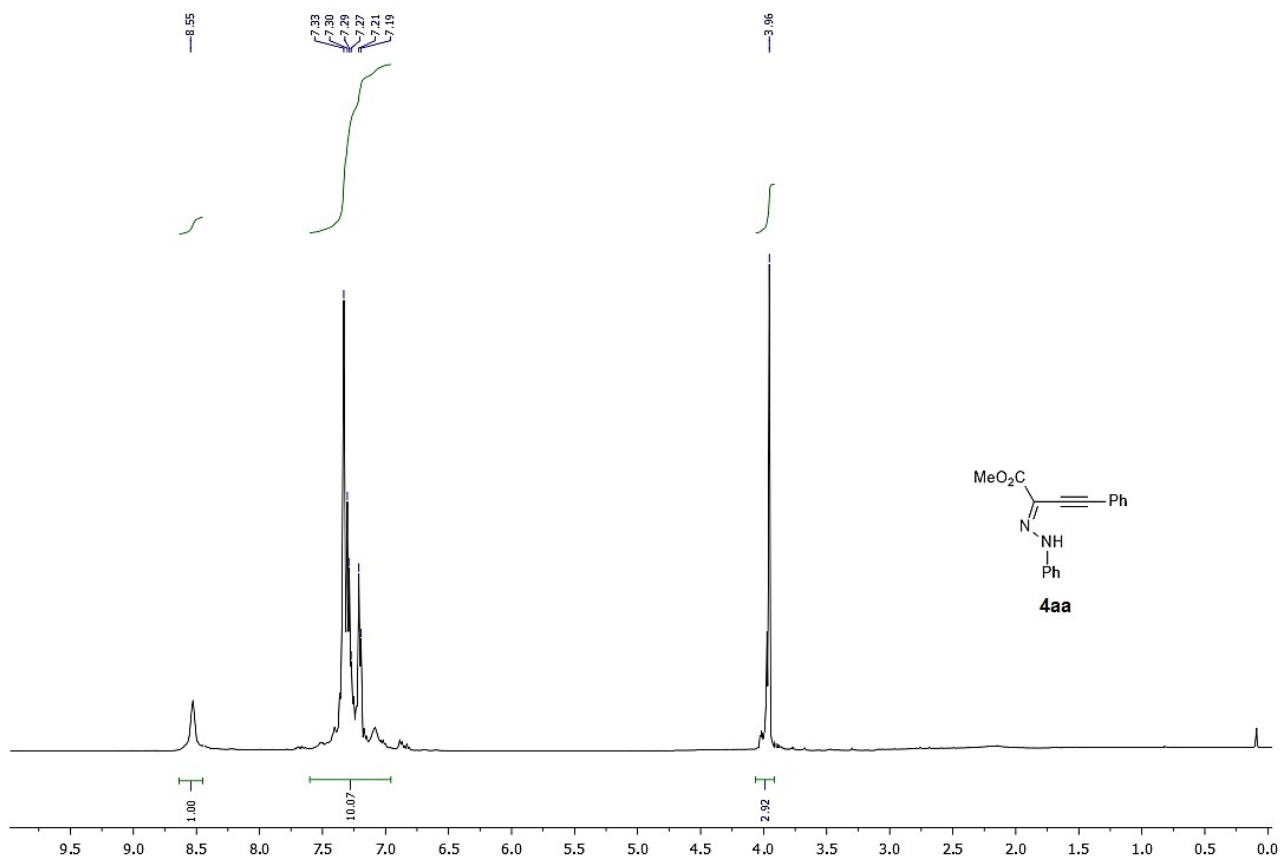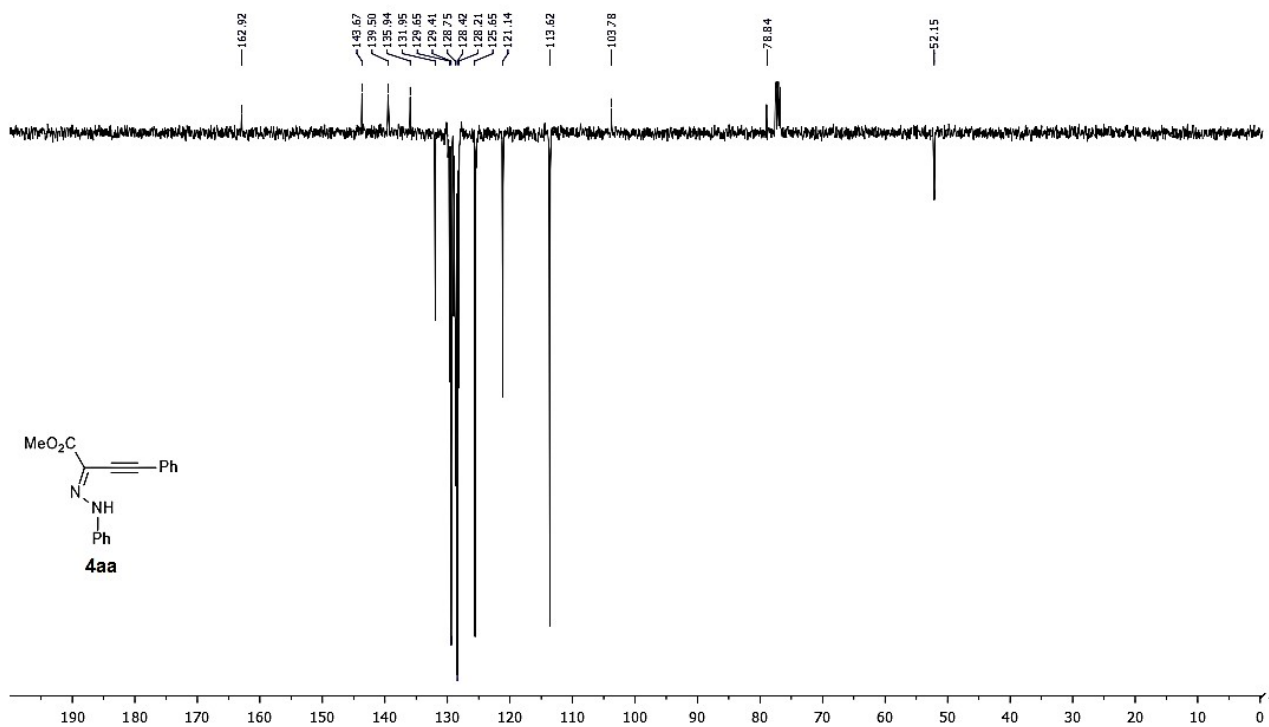

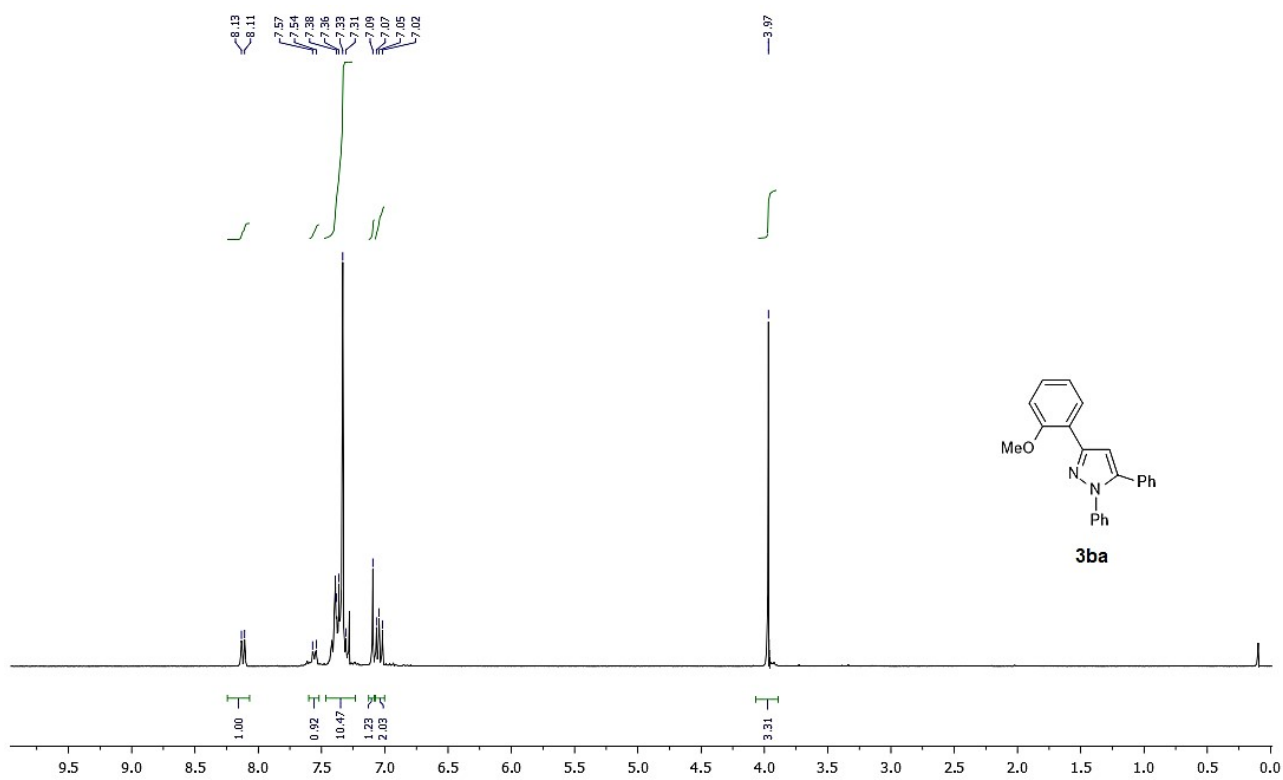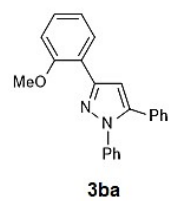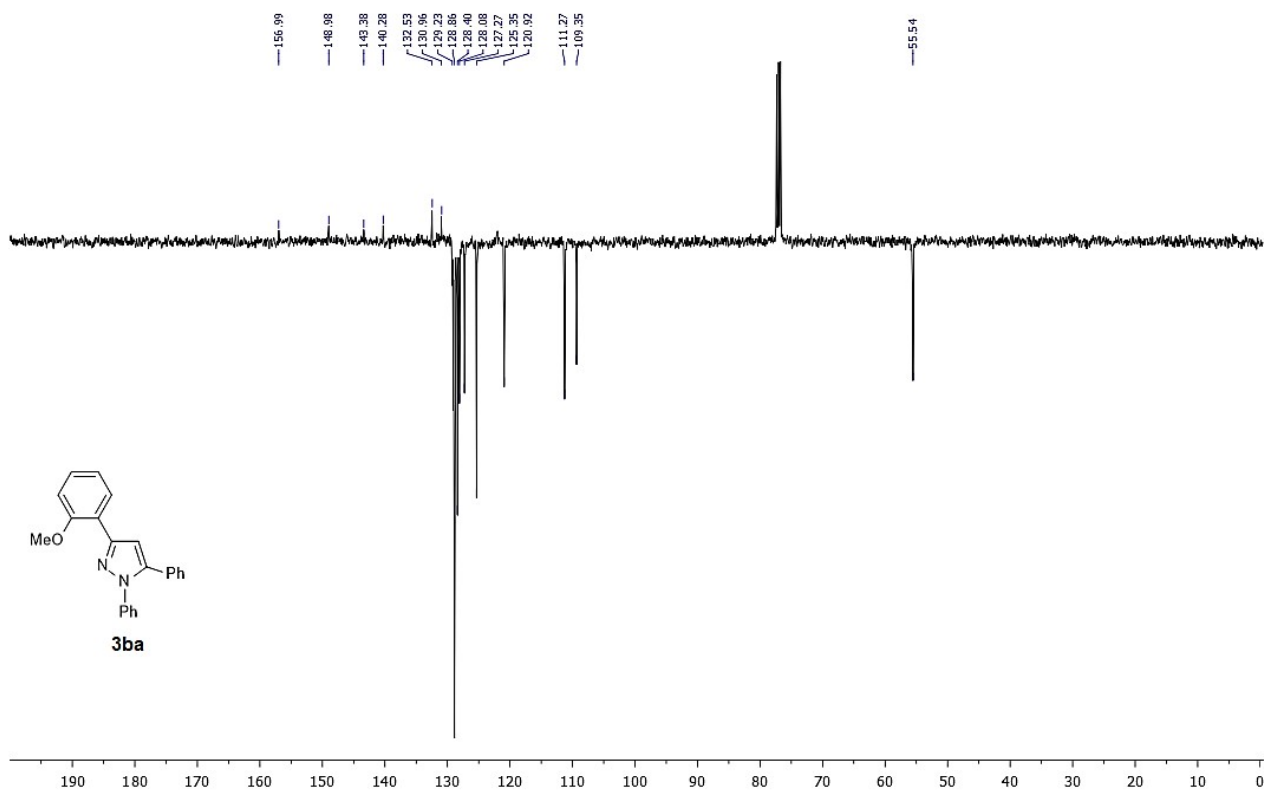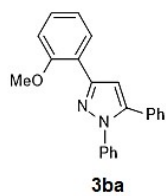

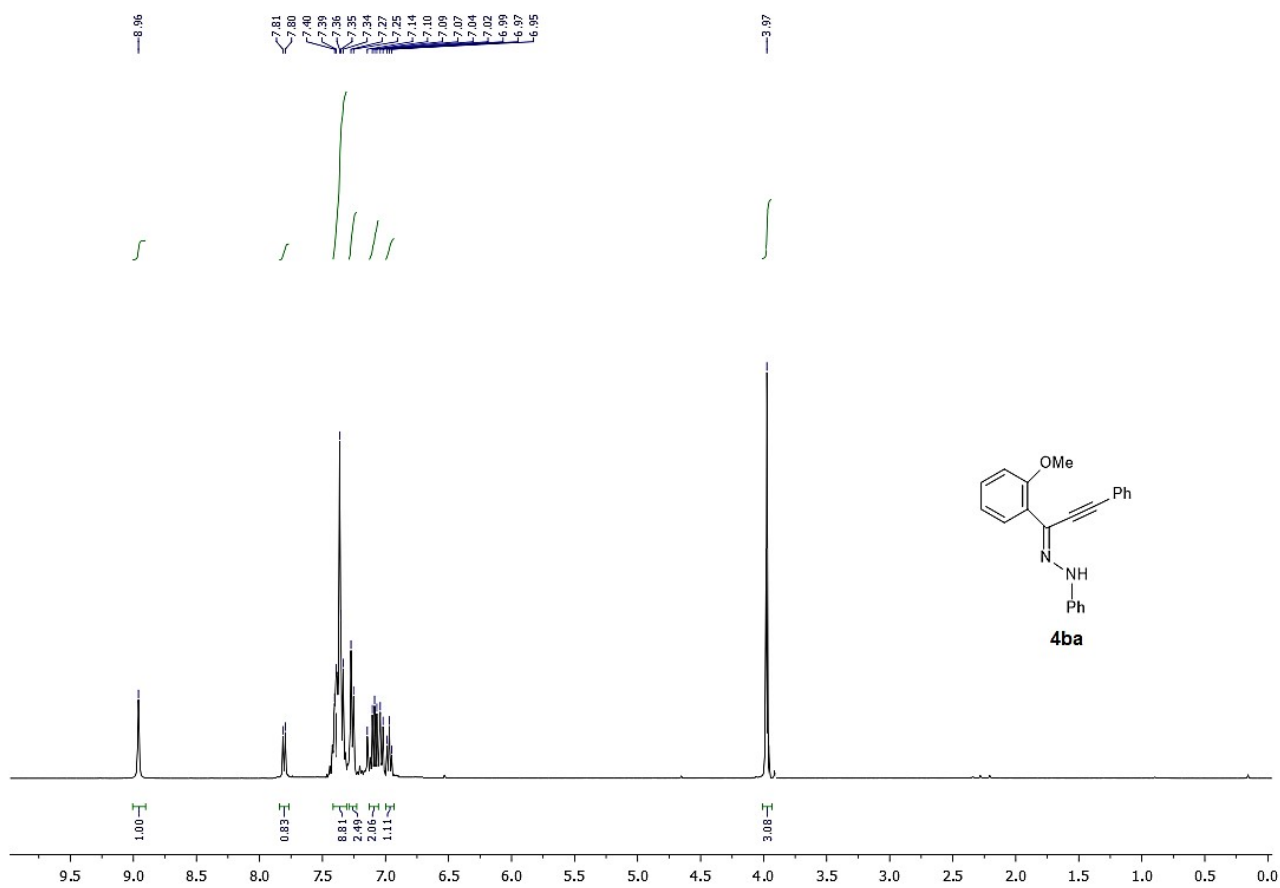

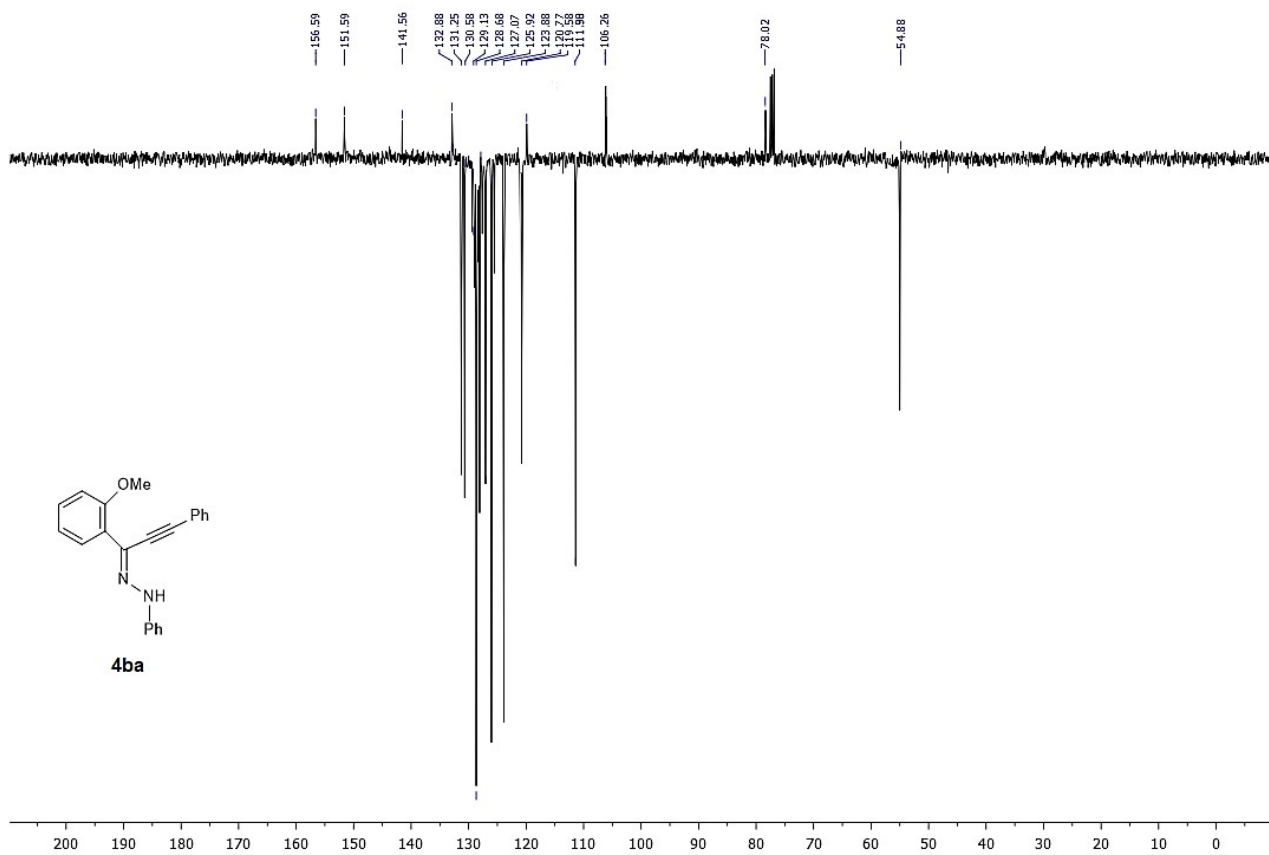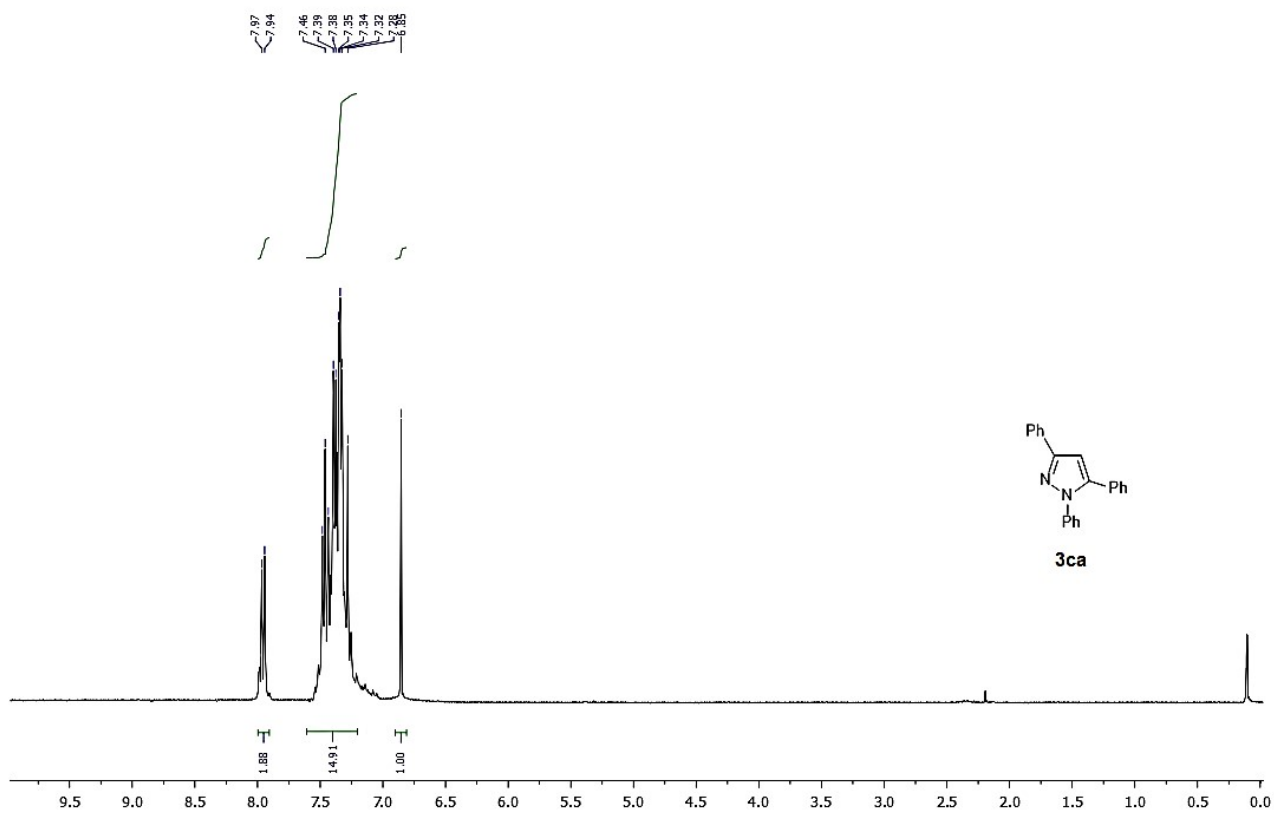

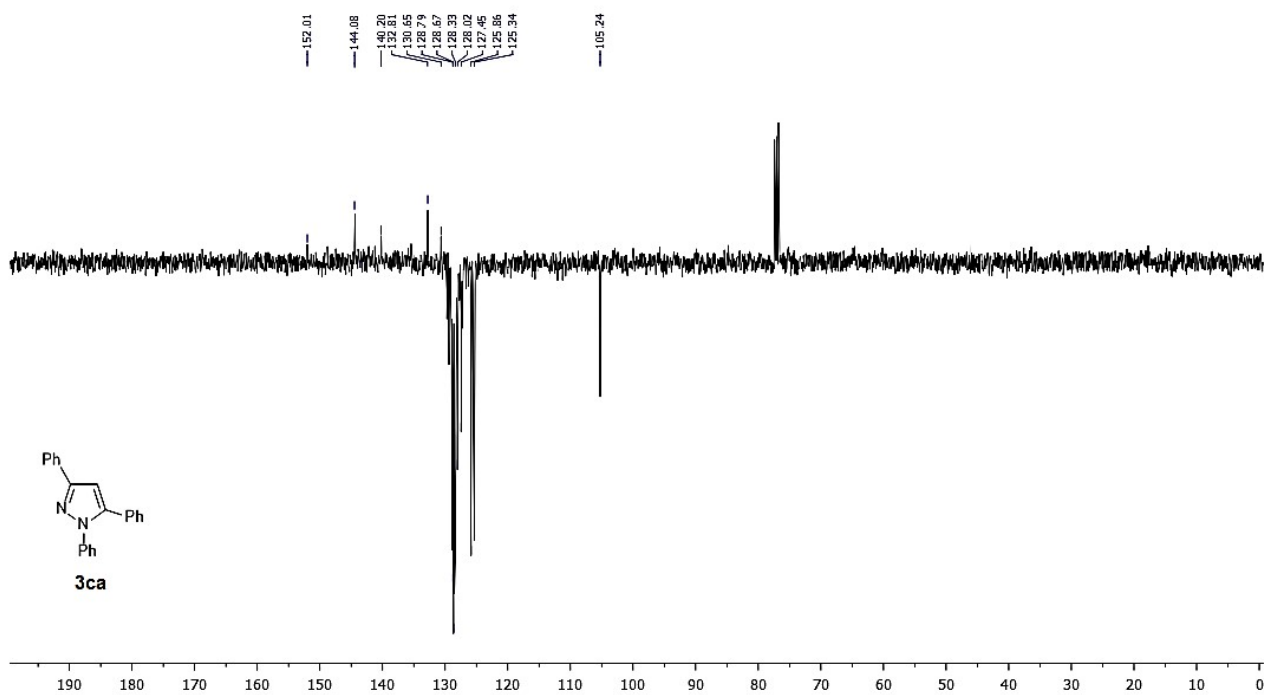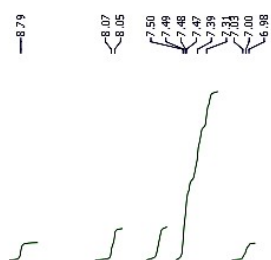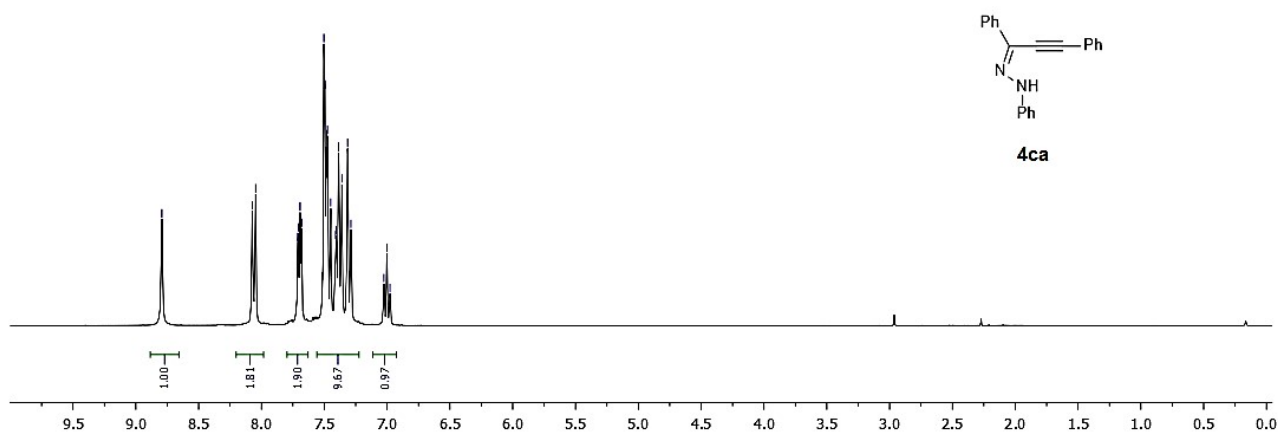

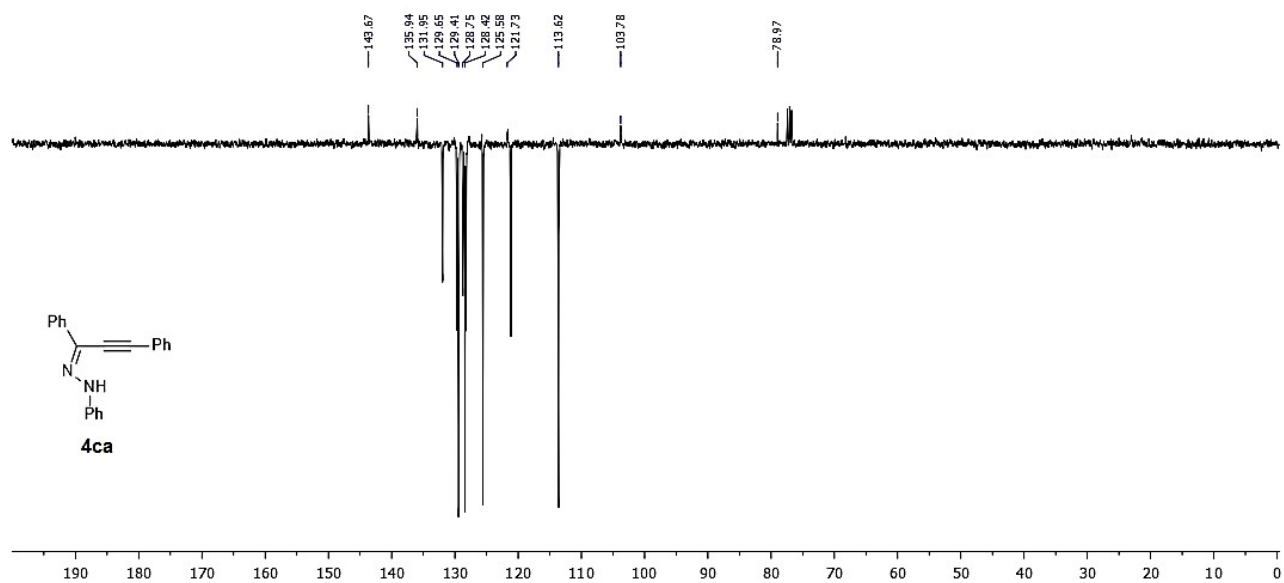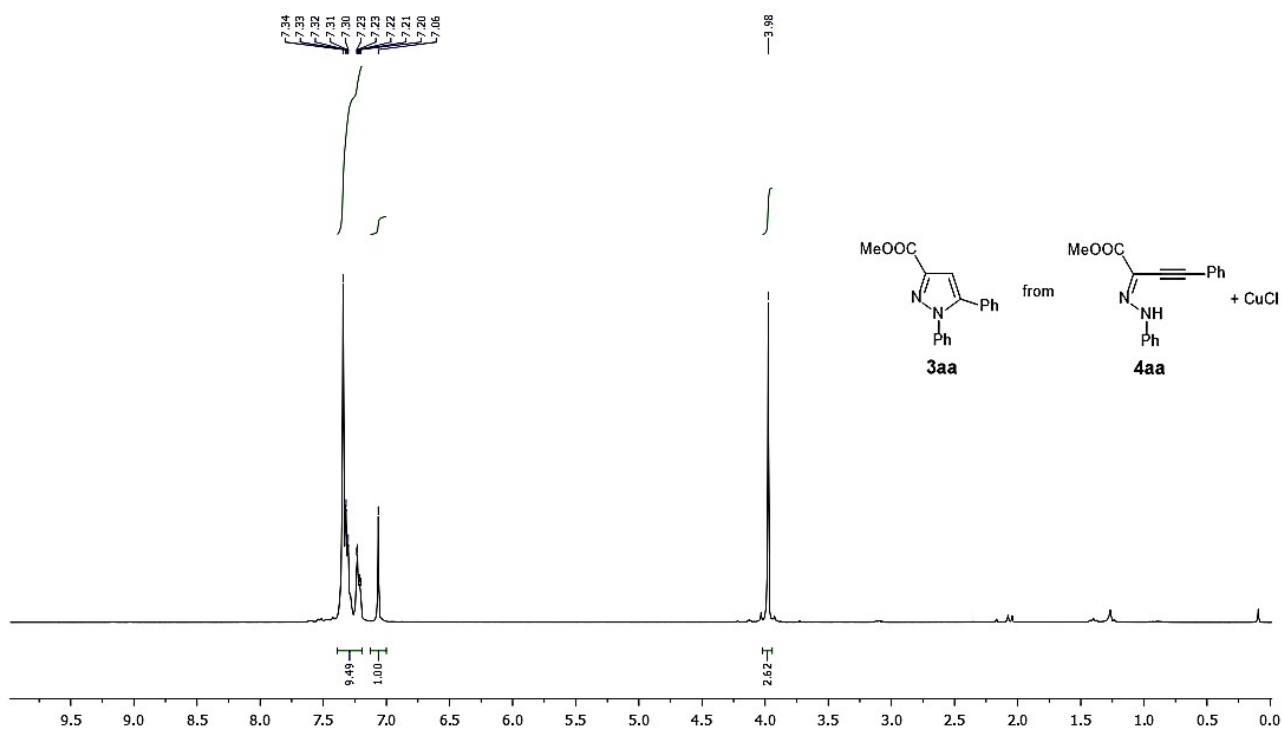

Supplement: d3nj02712k1.pdf [file d3nj02712k1.pdf]
